# Supplementary material for: Binder-free and high-loading sulfurized polyacrylonitrile cathode for lithium/sulfur batteries
Source: Royal Society of Chemistry journal article supplement (doi:10.1039/d1ra02462k), 2021-01-01
Supplement: d1ra02462k1.pdf [file d1ra02462k1.pdf]

Electronic Supporting Information

## Binder-free and high-loading sulfurized polyacrylonitrile cathode for lithium/sulfur batteries

Huihun Kim, Changhyeon Kim, Milan K. Sadan, Hyewon Yeo, Kwon-Koo Cho, Ki-Won Kim, Jou-Hyeon Ahn and Hyo-Jun Ahn\*

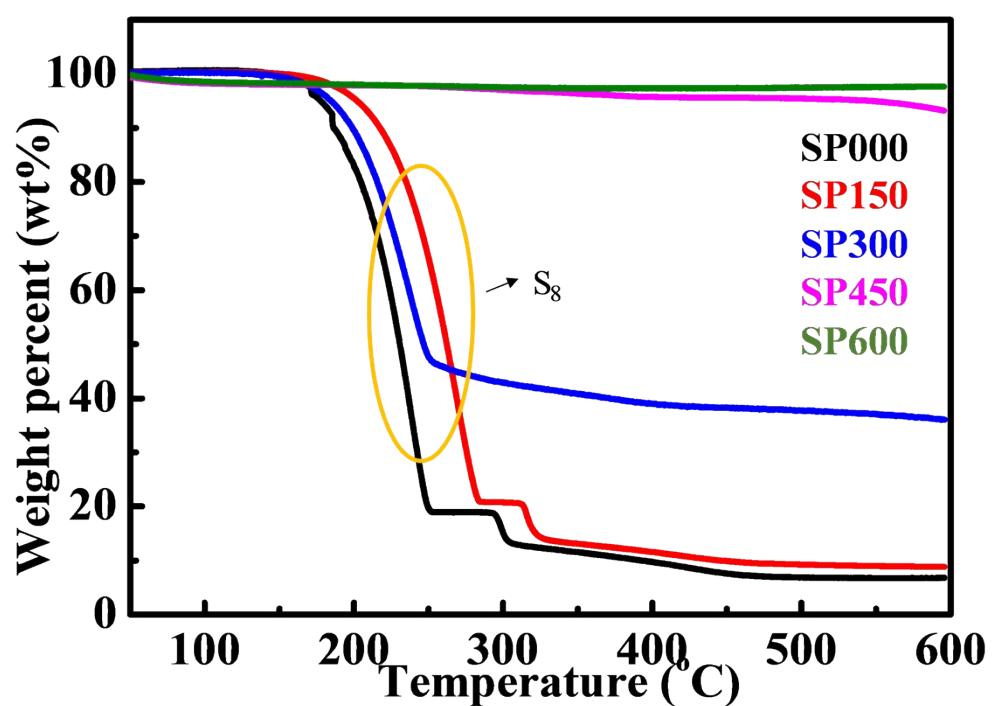

Fig. S1. TGA curves of SPpellet samples.

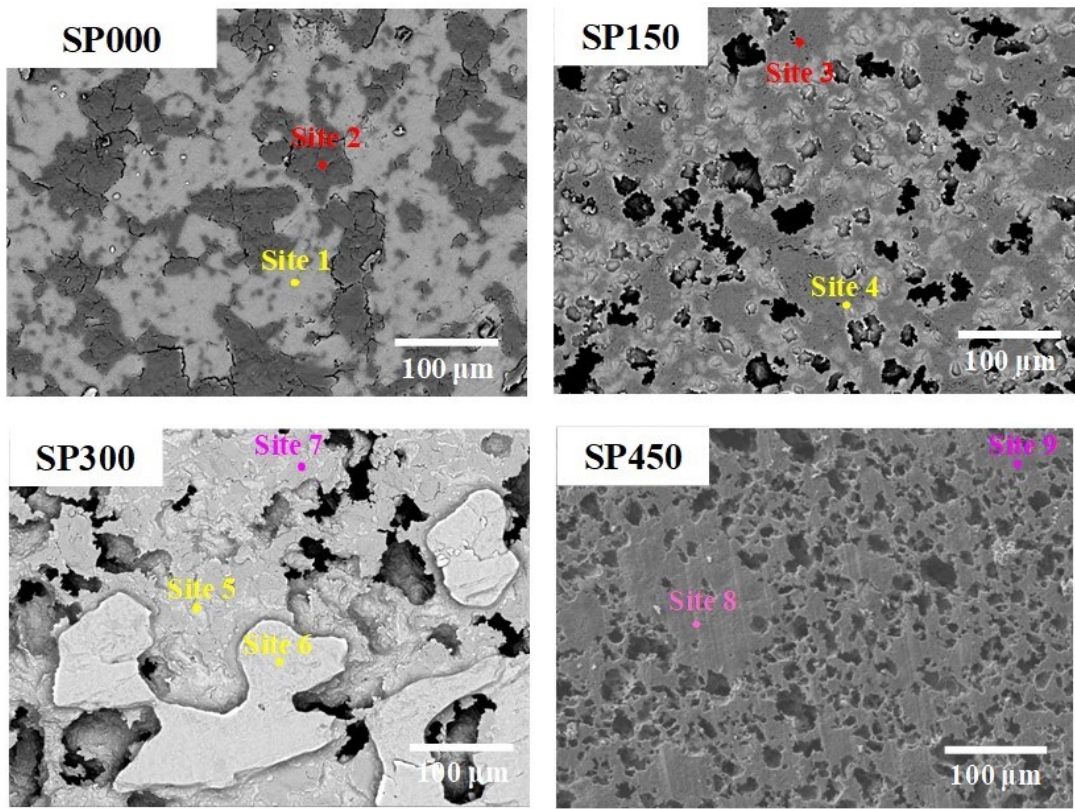

Unit : at%

| Sample/position |        | N     | C     | S    |
|-----------------|--------|-------|-------|------|
| SP000           | Site 1 | -     | -     | 100  |
|                 | Site 2 | 23.37 | 76.63 | -    |
| SP150           | Site 3 | -     | -     | 100  |
|                 | Site 4 | 21.45 | 78.55 | -    |
| SP300           | Site 5 | -     | -     | 100  |
|                 | Site 6 | -     | -     | 100  |
|                 | Site 7 | 6.21  | 72.7  | 21.5 |
| SP450           | Site 8 | 14.9  | 65.8  | 19.3 |
|                 | Site 9 | 14.7  | 64.5  | 20.8 |

Fig. S2. SEM images and EDS point mapping results for SPAN electrodes

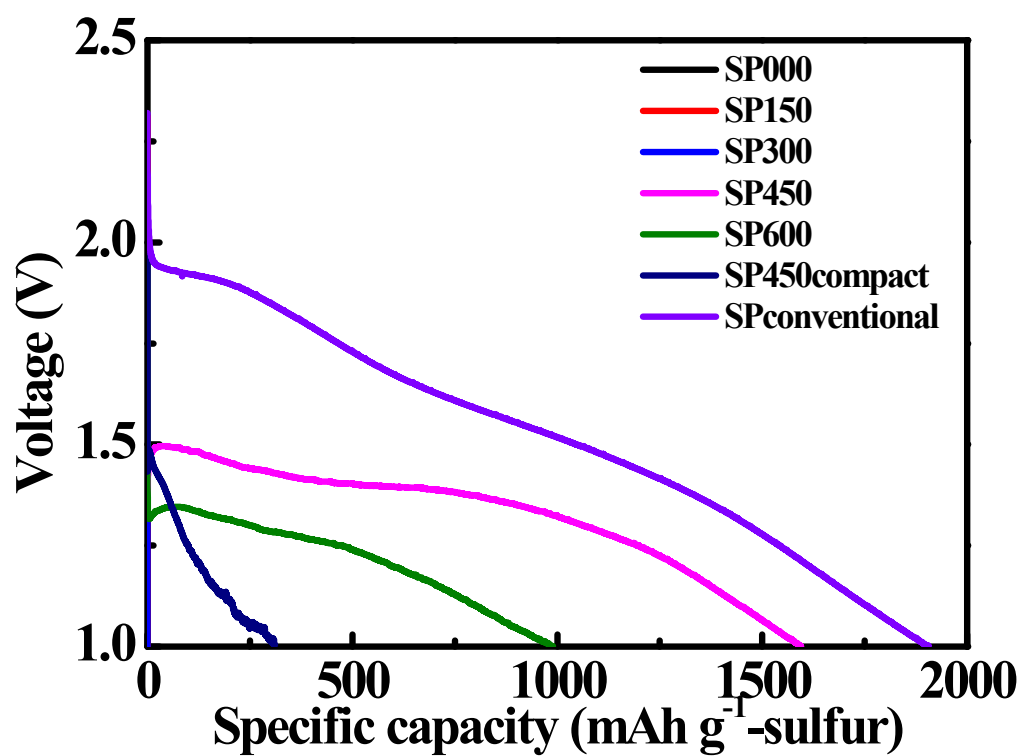

**Fig. S3.** Discharge-charge curves of various Li/SPAN cells at current density of 15 mA g<sup>-1</sup>.

electrode-

**Table S1.** Components of Li/SPAN cells.

| Sample name       | Cathode                 |                         |                          | Total cathode | Current collector<br>Al foil | Electrolyte<br>1 M LiPF <sub>6</sub><br>+<br>EC/DEC | Separator<br>Celgard 2400 | Anode<br>Lithium foil | Capacity<br>Based on sulfur | Capacity<br>Based on electrode without current collector | Capacity<br>Based on electrode with current collector |
|-------------------|-------------------------|-------------------------|--------------------------|---------------|------------------------------|-----------------------------------------------------|---------------------------|-----------------------|-----------------------------|----------------------------------------------------------|-------------------------------------------------------|
|                   | Active material (SP450) | Binder (β-cyclodextrin) | conducting agent (MWCNT) |               |                              |                                                     |                           |                       |                             |                                                          |                                                       |
| SP450compact      | 24.1 mg                 | -                       | -                        | 24.1 mg       | -                            | 30 mg                                               | 2.1 mg                    | 12.6 mg               | 321 mAh g <sup>-1</sup>     | 132 mAh g <sup>-1</sup>                                  | 132 mAh g <sup>-1</sup>                               |
| SP450conventional | 0.776 mg                | 0.097 mg                | 0.097 mg                 | 0.97 mg       | 3.83 mg                      | 10 mg                                               | 2.1 mg                    | 12.6 mg               | 1931 mAh g <sup>-1</sup>    | 649 mAh g <sup>-1</sup>                                  | 131 mAh g <sup>-1</sup>                               |
| SP450             | 16.37 mg                | -                       | -                        | 16.37 mg      | -                            | 30 mg                                               | 2.1 mg                    | 12.6 mg               | 1656 mAh g <sup>-1</sup>    | 679 mAh g <sup>-1</sup>                                  | 679 mAh g <sup>-1</sup>                               |

Table S2. Comparison of previous high loading sulfur with this report.

| <b>Sulfur loading<br/>mg cm<sup>-2</sup></b> | <b>E/S ratio<br/>uL/mg</b> | <b>Reversible capacity<br/>mAh g<sup>-1</sup>-sulfur<br/>(mAh cm<sup>-2</sup>)</b> | <b>Ref.</b> |
|----------------------------------------------|----------------------------|------------------------------------------------------------------------------------|-------------|
| 10.2                                         | 20                         | 600                                                                                | 1           |
| 8                                            | 15                         | 1000 (8)                                                                           | 2           |
| 13.2                                         | 15                         | 791 (7)                                                                            | 3           |
| 9.1                                          | 9                          | 400                                                                                | 4           |
| 10                                           | 5.7                        | 1000                                                                               | 5           |
| 13.5                                         | 3                          | 600                                                                                | 6           |
| 6.87                                         | 3.7                        | 1230                                                                               | This work   |

E/S ratio: Electrolyte/sulfur ratio

## Reference

- 1 C. Chen, J. Jiang, W. He, W. Lei, Q. Hao and X. Zhang, *Adv. Funct. Mater.*, 2020, **30**, 1909469.
- 2 J. Shi, Q. Kang, Y. Mi and Q. Xiao, *Electrochim. Acta*, 2019, **324**, 134849.
- 3 J. Wang, G. Yang, J. Chen, Y. Liu, Y. Wang, C.-Y. Lao, K. Xi, D. Yang, C.J. Harris, W. Yan, S. Ding and R.V. Kumar, *Adv. Energy Mater.*, 2019, **9**, 1902001.
- 4 J. Liao, J. Wang, Z. Liu and Z. Ye, *ACS Appl. Energy Mater.*, 2019, **2**, 6732-6740.
- 5 X. Yang, X. Gao, Q. Sun, S.P. Jand, Y. Yu, Y. Zhao, X. Li, K. Adair, L.-Y. Kuo, J. Rohrer, J. Liang, X. Lin, M.N. Banis, Y. Hu, H. Zhang, X. Li, R. Li, H. Zhang, P. Kaghazchi, T.-K. Sham and X. Sun, *Adv. Mater.*, 2019, **31**, 1901220
- 6 G. Li, W. Lei, D. Luo, Y. Deng, Z. Deng, D. Wang, A. Yu and Z. Chen, *Energy Environ. Sci.*, 2018, **11**, 2372-2381.
